# Supplementary material for: Identifying Patient Characteristics Associated With Opioid Use to Inform Surgical Pain Management
Source: PubMed Central journal article supplement (PMC10735081; doi:10.1097/as9.0000000000000355), 2023-11-14

Appendix/Supplement:  
 Procedure Grouping CPT Codes and Penn Medicine Opioid Guideline Amount

| Eligible for Report | Department   | Specialty/Division | Procedure Group           | CPT   | Opioid Guideline |
|---------------------|--------------|--------------------|---------------------------|-------|------------------|
| 1                   | NEUROSURGERY | NEUROSURGERY       | ACDF                      | 22551 | 0 - 30           |
| 1                   | NEUROSURGERY | NEUROSURGERY       | ACDF                      | 22552 | 0 - 30           |
| 1                   | NEUROSURGERY | NEUROSURGERY       | ACDF                      | 22554 | 0 - 30           |
| 1                   | NEUROSURGERY | NEUROSURGERY       | Thoracolumbar Fusion      | 22532 | 0 - 40           |
| 1                   | NEUROSURGERY | NEUROSURGERY       | Thoracolumbar Fusion      | 22533 | 0 - 40           |
| 1                   | NEUROSURGERY | NEUROSURGERY       | Thoracolumbar Fusion      | 22534 | 0 - 40           |
| 1                   | NEUROSURGERY | NEUROSURGERY       | Thoracolumbar Fusion      | 22556 | 0 - 40           |
| 1                   | NEUROSURGERY | NEUROSURGERY       | Thoracolumbar Fusion      | 22558 | 0 - 40           |
| 1                   | NEUROSURGERY | NEUROSURGERY       | Thoracolumbar Fusion      | 22585 | 0 - 40           |
| 1                   | NEUROSURGERY | NEUROSURGERY       | Thoracolumbar Fusion      | 22586 | 0 - 40           |
| 1                   | NEUROSURGERY | NEUROSURGERY       | Thoracolumbar Fusion      | 22610 | 0 - 40           |
| 1                   | NEUROSURGERY | NEUROSURGERY       | Thoracolumbar Fusion      | 22612 | 0 - 40           |
| 1                   | NEUROSURGERY | NEUROSURGERY       | Thoracolumbar Fusion      | 22614 | 0 - 40           |
| 1                   | NEUROSURGERY | NEUROSURGERY       | Thoracolumbar Fusion      | 22630 | 0 - 40           |
| 1                   | NEUROSURGERY | NEUROSURGERY       | Thoracolumbar Fusion      | 22632 | 0 - 40           |
| 1                   | NEUROSURGERY | NEUROSURGERY       | Thoracolumbar Fusion      | 22633 | 0 - 40           |
| 1                   | NEUROSURGERY | NEUROSURGERY       | Thoracolumbar Fusion      | 22634 | 0 - 40           |
| 1                   | NEUROSURGERY | NEUROSURGERY       | Thoracolumbar Fusion      | 22800 | 0 - 40           |
| 1                   | NEUROSURGERY | NEUROSURGERY       | Thoracolumbar Fusion      | 22802 | 0 - 40           |
| 1                   | NEUROSURGERY | NEUROSURGERY       | Thoracolumbar Fusion      | 22804 | 0 - 40           |
| 1                   | NEUROSURGERY | NEUROSURGERY       | Thoracolumbar Laminectomy | 62380 | 0 - 30           |
| 1                   | NEUROSURGERY | NEUROSURGERY       | Thoracolumbar Laminectomy | 63001 | 0 - 30           |
| 1                   | NEUROSURGERY | NEUROSURGERY       | Thoracolumbar Laminectomy | 63005 | 0 - 30           |
| 1                   | NEUROSURGERY | NEUROSURGERY       | Thoracolumbar Laminectomy | 63012 | 0 - 30           |
| 1                   | NEUROSURGERY | NEUROSURGERY       | Thoracolumbar Laminectomy | 63015 | 0 - 30           |
| 1                   | NEUROSURGERY | NEUROSURGERY       | Thoracolumbar Laminectomy | 63016 | 0 - 30           |
| 1                   | NEUROSURGERY | NEUROSURGERY       | Thoracolumbar Laminectomy | 63017 | 0 - 30           |
| 1                   | NEUROSURGERY | NEUROSURGERY       | Thoracolumbar Laminectomy | 63020 | 0 - 30           |
| 1                   | NEUROSURGERY | NEUROSURGERY       | Thoracolumbar Laminectomy | 63030 | 0 - 30           |
| 1                   | NEUROSURGERY | NEUROSURGERY       | Thoracolumbar Laminectomy | 63035 | 0 - 30           |
| 1                   | NEUROSURGERY | NEUROSURGERY       | Thoracolumbar Laminectomy | 63040 | 0 - 30           |
| 1                   | NEUROSURGERY | NEUROSURGERY       | Thoracolumbar Laminectomy | 63042 | 0 - 30           |
| 1                   | NEUROSURGERY | NEUROSURGERY       | Thoracolumbar Laminectomy | 63043 | 0 - 30           |
| 1                   | NEUROSURGERY | NEUROSURGERY       | Thoracolumbar Laminectomy | 63044 | 0 - 30           |
| 1                   | NEUROSURGERY | NEUROSURGERY       | Thoracolumbar Laminectomy | 63045 | 0 - 30           |
| 1                   | NEUROSURGERY | NEUROSURGERY       | Thoracolumbar Laminectomy | 63046 | 0 - 30           |
| 1                   | NEUROSURGERY | NEUROSURGERY       | Thoracolumbar Laminectomy | 63047 | 0 - 30           |
| 1                   | NEUROSURGERY | NEUROSURGERY       | Thoracolumbar Laminectomy | 63048 | 0 - 30           |
| 1                   | NEUROSURGERY | NEUROSURGERY       | Thoracolumbar Laminectomy | 63055 | 0 - 30           |
| 1                   | NEUROSURGERY | NEUROSURGERY       | Thoracolumbar Laminectomy | 63056 | 0 - 30           |
| 1                   | NEUROSURGERY | NEUROSURGERY       | Thoracolumbar Laminectomy | 63057 | 0 - 30           |
| 1                   | NEUROSURGERY | NEUROSURGERY       | Thoracolumbar Laminectomy | 63075 | 0 - 30           |
| 1                   | NEUROSURGERY | NEUROSURGERY       | Thoracolumbar Laminectomy | 63076 | 0 - 30           |

|   |              |              |                                                |       |        |
|---|--------------|--------------|------------------------------------------------|-------|--------|
| 1 | NEUROSURGERY | NEUROSURGERY | Thoracolumbar Laminectomy                      | 63081 | 0 - 30 |
| 1 | NEUROSURGERY | NEUROSURGERY | Thoracolumbar Laminectomy                      | 63082 | 0 - 30 |
| 1 | NEUROSURGERY | NEUROSURGERY | Thoracolumbar Laminectomy                      | 63085 | 0 - 30 |
| 1 | NEUROSURGERY | NEUROSURGERY | Thoracolumbar Laminectomy                      | 63086 | 0 - 30 |
| 1 | NEUROSURGERY | NEUROSURGERY | Thoracolumbar Laminectomy                      | 63102 | 0 - 30 |
| 1 | NEUROSURGERY | NEUROSURGERY | Thoracolumbar Laminectomy                      | 63103 | 0 - 30 |
| 1 | NEUROSURGERY | NEUROSURGERY | Thoracolumbar Laminectomy                      | 63265 | 0 - 30 |
| 1 | NEUROSURGERY | NEUROSURGERY | Thoracolumbar Laminectomy                      | 63266 | 0 - 30 |
| 1 | NEUROSURGERY | NEUROSURGERY | Thoracolumbar Laminectomy                      | 63267 | 0 - 30 |
| 1 | NEUROSURGERY | NEUROSURGERY | Thoracolumbar Laminectomy                      | 63268 | 0 - 30 |
| 1 | NEUROSURGERY | NEUROSURGERY | Thoracolumbar Laminectomy                      | 63272 | 0 - 30 |
| 1 | NEUROSURGERY | NEUROSURGERY | Thoracolumbar Laminectomy                      | 63273 | 0 - 30 |
| 1 | NEUROSURGERY | NEUROSURGERY | Thoracolumbar Laminectomy                      | 63275 | 0 - 30 |
| 1 | NEUROSURGERY | NEUROSURGERY | Thoracolumbar Laminectomy                      | 63276 | 0 - 30 |
| 1 | NEUROSURGERY | NEUROSURGERY | Thoracolumbar Laminectomy                      | 63277 | 0 - 30 |
| 1 | NEUROSURGERY | NEUROSURGERY | Thoracolumbar Laminectomy                      | 63280 | 0 - 30 |
| 1 | NEUROSURGERY | NEUROSURGERY | Thoracolumbar Laminectomy                      | 63281 | 0 - 30 |
| 1 | NEUROSURGERY | NEUROSURGERY | Thoracolumbar Laminectomy                      | 63282 | 0 - 30 |
| 1 | NEUROSURGERY | NEUROSURGERY | Thoracolumbar Laminectomy                      | 63290 | 0 - 30 |
| 1 | NEUROSURGERY | NEUROSURGERY | Thoracolumbar Laminectomy                      | 63295 | 0 - 30 |
| 1 | ORTHOPAEDICS | ORTHOPAEDICS | Arthroplasty - Hip                             | 27137 | 0 - 20 |
| 1 | ORTHOPAEDICS | ORTHOPAEDICS | Arthroplasty - Hip                             | 27138 | 0 - 20 |
| 1 | ORTHOPAEDICS | ORTHOPAEDICS | Arthroplasty - Hip                             | 27134 | 0 - 20 |
| 1 | ORTHOPAEDICS | ORTHOPAEDICS | Arthroplasty - Hip                             | 27132 | 0 - 20 |
| 1 | ORTHOPAEDICS | ORTHOPAEDICS | Arthroplasty - Hip                             | 27130 | 0 - 20 |
| 1 | ORTHOPAEDICS | ORTHOPAEDICS | Arthroplasty - Knee                            | 27488 | 0 - 25 |
| 1 | ORTHOPAEDICS | ORTHOPAEDICS | Arthroplasty - Knee                            | 27441 | 0 - 25 |
| 1 | ORTHOPAEDICS | ORTHOPAEDICS | Arthroplasty - Knee                            | 27442 | 0 - 25 |
| 1 | ORTHOPAEDICS | ORTHOPAEDICS | Arthroplasty - Knee                            | 27438 | 0 - 25 |
| 1 | ORTHOPAEDICS | ORTHOPAEDICS | Arthroplasty - Knee                            | 27443 | 0 - 25 |
| 1 | ORTHOPAEDICS | ORTHOPAEDICS | Arthroplasty - Knee                            | 27440 | 0 - 25 |
| 1 | ORTHOPAEDICS | ORTHOPAEDICS | Arthroplasty - Knee                            | 27420 | 0 - 25 |
| 1 | ORTHOPAEDICS | ORTHOPAEDICS | Arthroplasty - Knee                            | 27422 | 0 - 25 |
| 1 | ORTHOPAEDICS | ORTHOPAEDICS | Arthroplasty - Knee                            | 27381 | 0 - 25 |
| 1 | ORTHOPAEDICS | ORTHOPAEDICS | Arthroplasty - Knee                            | 27380 | 0 - 25 |
| 1 | ORTHOPAEDICS | ORTHOPAEDICS | Arthroplasty - Knee                            | 27418 | 0 - 25 |
| 1 | ORTHOPAEDICS | ORTHOPAEDICS | Arthroplasty - Knee                            | 27487 | 0 - 25 |
| 1 | ORTHOPAEDICS | ORTHOPAEDICS | Arthroplasty - Knee                            | 27486 | 0 - 25 |
| 1 | ORTHOPAEDICS | ORTHOPAEDICS | Arthroplasty - Knee                            | 27447 | 0 - 25 |
| 1 | ORTHOPAEDICS | ORTHOPAEDICS | Arthroplasty - Knee                            | 27446 | 0 - 25 |
| 1 | ORTHOPAEDICS | ORTHOPAEDICS | Arthroplasty - Shoulder                        | 23470 | 0 - 25 |
| 1 | ORTHOPAEDICS | ORTHOPAEDICS | Arthroplasty - Shoulder                        | 23474 | 0 - 25 |
| 1 | ORTHOPAEDICS | ORTHOPAEDICS | Arthroplasty - Shoulder                        | 23473 | 0 - 25 |
| 1 | ORTHOPAEDICS | ORTHOPAEDICS | Arthroplasty - Shoulder                        | 23472 | 0 - 25 |
| 1 | ORTHOPAEDICS | ORTHOPAEDICS | Fracture Treatment - Ankle except trimalleolar | 27818 | 0 - 15 |
| 1 | ORTHOPAEDICS | ORTHOPAEDICS | Fracture Treatment - Ankle except trimalleolar | 27814 | 0 - 15 |

|   |              |              |                                                |       |        |
|---|--------------|--------------|------------------------------------------------|-------|--------|
| 1 | ORTHOPAEDICS | ORTHOPAEDICS | Fracture Treatment - Ankle except trimalleolar | 27810 | 0 - 15 |
| 1 | ORTHOPAEDICS | ORTHOPAEDICS | Fracture Treatment - Ankle except trimalleolar | 27792 | 0 - 15 |
| 1 | ORTHOPAEDICS | ORTHOPAEDICS | Fracture Treatment - Ankle except trimalleolar | 27784 | 0 - 15 |
| 1 | ORTHOPAEDICS | ORTHOPAEDICS | Fracture Treatment - Ankle except trimalleolar | 27766 | 0 - 15 |
| 1 | ORTHOPAEDICS | ORTHOPAEDICS | Fracture Treatment - Radius/Ulna               | 25600 | 0 - 15 |
| 1 | ORTHOPAEDICS | ORTHOPAEDICS | Fracture Treatment - Radius/Ulna               | 25605 | 0 - 15 |
| 1 | ORTHOPAEDICS | ORTHOPAEDICS | Fracture Treatment - Radius/Ulna               | 25525 | 0 - 15 |
| 1 | ORTHOPAEDICS | ORTHOPAEDICS | Fracture Treatment - Radius/Ulna               | 25608 | 0 - 15 |
| 1 | ORTHOPAEDICS | ORTHOPAEDICS | Fracture Treatment - Radius/Ulna               | 25526 | 0 - 15 |
| 1 | ORTHOPAEDICS | ORTHOPAEDICS | Fracture Treatment - Radius/Ulna               | 24685 | 0 - 15 |
| 1 | ORTHOPAEDICS | ORTHOPAEDICS | Fracture Treatment - Radius/Ulna               | 25609 | 0 - 15 |
| 1 | ORTHOPAEDICS | ORTHOPAEDICS | Fracture Treatment - Radius/Ulna               | 25520 | 0 - 15 |
| 1 | ORTHOPAEDICS | ORTHOPAEDICS | Fracture Treatment - Radius/Ulna               | 25607 | 0 - 15 |
| 1 | ORTHOPAEDICS | ORTHOPAEDICS | Fracture Treatment - Radius/Ulna               | 25606 | 0 - 15 |
| 1 | ORTHOPAEDICS | ORTHOPAEDICS | Fracture Treatment - Radius/Ulna               | 25575 | 0 - 15 |
| 1 | ORTHOPAEDICS | ORTHOPAEDICS | Fracture Treatment - Radius/Ulna               | 25574 | 0 - 15 |
| 1 | ORTHOPAEDICS | ORTHOPAEDICS | Fracture Treatment - Radius/Ulna               | 25565 | 0 - 15 |
| 1 | ORTHOPAEDICS | ORTHOPAEDICS | Fracture Treatment - Radius/Ulna               | 25545 | 0 - 15 |
| 1 | ORTHOPAEDICS | ORTHOPAEDICS | Fracture Treatment - Radius/Ulna               | 25535 | 0 - 15 |
| 1 | ORTHOPAEDICS | ORTHOPAEDICS | Fracture Treatment - Radius/Ulna               | 25515 | 0 - 15 |
| 1 | ORTHOPAEDICS | ORTHOPAEDICS | Fracture Treatment - Radius/Ulna               | 25505 | 0 - 15 |
| 1 | ORTHOPAEDICS | ORTHOPAEDICS | Fracture Treatment - Radius/Ulna               | 24670 | 0 - 15 |
| 1 | ORTHOPAEDICS | ORTHOPAEDICS | Fracture Treatment - Radius/Ulna               | 24666 | 0 - 15 |
| 1 | ORTHOPAEDICS | ORTHOPAEDICS | Fracture Treatment - Radius/Ulna               | 24665 | 0 - 15 |
| 1 | ORTHOPAEDICS | ORTHOPAEDICS | Knee Procedures - Ligament Procedures          | 29888 | 0 - 15 |
| 1 | ORTHOPAEDICS | ORTHOPAEDICS | Knee Procedures - Ligament Procedures          | 29889 | 0 - 15 |
| 1 | ORTHOPAEDICS | ORTHOPAEDICS | Shoulder Procedures - Arthroscopy              | 29826 | 0 - 15 |
| 1 | ORTHOPAEDICS | ORTHOPAEDICS | Shoulder Procedures - Arthroscopy              | 29825 | 0 - 15 |
| 1 | ORTHOPAEDICS | ORTHOPAEDICS | Shoulder Procedures - Arthroscopy              | 29824 | 0 - 15 |
| 1 | ORTHOPAEDICS | ORTHOPAEDICS | Shoulder Procedures - Arthroscopy              | 29823 | 0 - 15 |
| 1 | ORTHOPAEDICS | ORTHOPAEDICS | Shoulder Procedures - Arthroscopy              | 29822 | 0 - 15 |
| 1 | ORTHOPAEDICS | ORTHOPAEDICS | Shoulder Procedures - Arthroscopy              | 29820 | 0 - 15 |
| 1 | ORTHOPAEDICS | ORTHOPAEDICS | Shoulder Procedures - Arthroscopy              | 29819 | 0 - 15 |
| 1 | ORTHOPAEDICS | ORTHOPAEDICS | Shoulder Procedures - Arthroscopy              | 29807 | 0 - 15 |
| 1 | ORTHOPAEDICS | ORTHOPAEDICS | Shoulder Procedures - Arthroscopy              | 29806 | 0 - 15 |
| 1 | ORTHOPAEDICS | ORTHOPAEDICS | Shoulder Procedures - Arthroscopy              | 29805 | 0 - 15 |
| 1 | ORTHOPAEDICS | ORTHOPAEDICS | Simple Knee Arthroscopy                        | 27415 | 0 - 10 |
| 1 | ORTHOPAEDICS | ORTHOPAEDICS | Simple Knee Arthroscopy                        | 29879 | 0 - 10 |
| 1 | ORTHOPAEDICS | ORTHOPAEDICS | Simple Knee Arthroscopy                        | 27416 | 0 - 10 |
| 1 | ORTHOPAEDICS | ORTHOPAEDICS | Simple Knee Arthroscopy                        | 29887 | 0 - 10 |
| 1 | ORTHOPAEDICS | ORTHOPAEDICS | Simple Knee Arthroscopy                        | 29885 | 0 - 10 |
| 1 | ORTHOPAEDICS | ORTHOPAEDICS | Simple Knee Arthroscopy                        | 29877 | 0 - 10 |
| 1 | ORTHOPAEDICS | ORTHOPAEDICS | Simple Knee Arthroscopy                        | 29867 | 0 - 10 |
| 1 | ORTHOPAEDICS | ORTHOPAEDICS | Simple Knee Arthroscopy                        | 29866 | 0 - 10 |
| 1 | ORTHOPAEDICS | ORTHOPAEDICS | Simple Knee Arthroscopy                        | 27403 | 0 - 10 |
| 1 | ORTHOPAEDICS | ORTHOPAEDICS | Simple Knee Arthroscopy                        | 29880 | 0 - 10 |

|   |              |                 |                                              |       |        |
|---|--------------|-----------------|----------------------------------------------|-------|--------|
| 1 | ORTHOPAEDICS | ORTHOPAEDICS    | Simple Knee Arthroscopy                      | 29881 | 0 - 10 |
| 1 | ORTHOPAEDICS | ORTHOPAEDICS    | Simple Knee Arthroscopy                      | 29883 | 0 - 10 |
| 1 | ORTHOPAEDICS | ORTHOPAEDICS    | Simple Knee Arthroscopy                      | 29882 | 0 - 10 |
| 1 | ORTHOPAEDICS | ORTHOPAEDICS    | Simple Knee Arthroscopy                      | 29884 | 0 - 10 |
| 1 | ORTHOPAEDICS | ORTHOPAEDICS    | Simple Knee Arthroscopy                      | 29875 | 0 - 10 |
| 1 | ORTHOPAEDICS | ORTHOPAEDICS    | Simple Knee Arthroscopy                      | 29873 | 0 - 10 |
| 1 | ORTHOPAEDICS | ORTHOPAEDICS    | Simple Knee Arthroscopy                      | 29871 | 0 - 10 |
| 1 | ORTHOPAEDICS | ORTHOPAEDICS    | Simple Knee Arthroscopy                      | 29870 | 0 - 10 |
| 1 | ORTHOPAEDICS | ORTHOPAEDICS    | Simple Knee Arthroscopy                      | 29874 | 0 - 10 |
| 1 | ORTHOPAEDICS | ORTHOPAEDICS    | Trigger Finger Release                       | 26055 | 0 - 5  |
| 1 | SURGERY      | CARDIAC SURGERY | Aortic Valve Replacement                     | 33405 | 0 - 10 |
| 1 | SURGERY      | CARDIAC SURGERY | Aortic Valve Replacement                     | 33412 | 0 - 10 |
| 1 | SURGERY      | CARDIAC SURGERY | Aortic Valve Replacement                     | 33410 | 0 - 10 |
| 1 | SURGERY      | CARDIAC SURGERY | Aortic Valve Replacement                     | 33411 | 0 - 10 |
| 1 | SURGERY      | CARDIAC SURGERY | Aortic Valve Replacement                     | 33406 | 0 - 10 |
| 1 | SURGERY      | CARDIAC SURGERY | Coronary Artery Bypass Graft (CABG)          | 33516 | 0 - 15 |
| 1 | SURGERY      | CARDIAC SURGERY | Coronary Artery Bypass Graft (CABG)          | 33514 | 0 - 15 |
| 1 | SURGERY      | CARDIAC SURGERY | Coronary Artery Bypass Graft (CABG)          | 33521 | 0 - 15 |
| 1 | SURGERY      | CARDIAC SURGERY | Coronary Artery Bypass Graft (CABG)          | 33517 | 0 - 15 |
| 1 | SURGERY      | CARDIAC SURGERY | Coronary Artery Bypass Graft (CABG)          | 33534 | 0 - 15 |
| 1 | SURGERY      | CARDIAC SURGERY | Coronary Artery Bypass Graft (CABG)          | 33518 | 0 - 15 |
| 1 | SURGERY      | CARDIAC SURGERY | Coronary Artery Bypass Graft (CABG)          | 33519 | 0 - 15 |
| 1 | SURGERY      | CARDIAC SURGERY | Coronary Artery Bypass Graft (CABG)          | 33513 | 0 - 15 |
| 1 | SURGERY      | CARDIAC SURGERY | Coronary Artery Bypass Graft (CABG)          | 33535 | 0 - 15 |
| 1 | SURGERY      | CARDIAC SURGERY | Coronary Artery Bypass Graft (CABG)          | 33530 | 0 - 15 |
| 1 | SURGERY      | CARDIAC SURGERY | Coronary Artery Bypass Graft (CABG)          | 33533 | 0 - 15 |
| 1 | SURGERY      | CARDIAC SURGERY | Coronary Artery Bypass Graft (CABG)          | 33511 | 0 - 15 |
| 1 | SURGERY      | CARDIAC SURGERY | Coronary Artery Bypass Graft (CABG)          | 33512 | 0 - 15 |
| 1 | SURGERY      | CARDIAC SURGERY | Coronary Artery Bypass Graft (CABG)          | 33536 | 0 - 15 |
| 1 | SURGERY      | CARDIAC SURGERY | Coronary Artery Bypass Graft (CABG)          | 33510 | 0 - 15 |
| 1 | SURGERY      | GENERAL SURGERY | Appendectomy - Laparoscopic                  | 44970 | 0 - 10 |
| 1 | SURGERY      | GENERAL SURGERY | Cholecystectomy - Laparoscopic               | 47563 | 0 - 10 |
| 1 | SURGERY      | GENERAL SURGERY | Cholecystectomy - Laparoscopic               | 47564 | 0 - 10 |
| 1 | SURGERY      | GENERAL SURGERY | Cholecystectomy - Laparoscopic               | 47562 | 0 - 10 |
| 1 | SURGERY      | GENERAL SURGERY | Colon Resection - Laparoscopic               | 44204 | 0 - 10 |
| 1 | SURGERY      | GENERAL SURGERY | Colon Resection - Laparoscopic               | 44208 | 0 - 10 |
| 1 | SURGERY      | GENERAL SURGERY | Colon Resection - Laparoscopic               | 44206 | 0 - 10 |
| 1 | SURGERY      | GENERAL SURGERY | Colon Resection - Laparoscopic               | 44205 | 0 - 10 |
| 1 | SURGERY      | GENERAL SURGERY | Colon Resection - Laparoscopic               | 44210 | 0 - 10 |
| 1 | SURGERY      | GENERAL SURGERY | Colon Resection - Laparoscopic               | 44207 | 0 - 10 |
| 1 | SURGERY      | GENERAL SURGERY | Colon Resection - Laparoscopic               | 44212 | 0 - 10 |
| 1 | SURGERY      | GENERAL SURGERY | Colon Resection - Laparoscopic               | 44211 | 0 - 10 |
| 1 | SURGERY      | GENERAL SURGERY | Gastric Restrictive Procedure - Laparoscopic | 43774 | 0 - 10 |
| 1 | SURGERY      | GENERAL SURGERY | Gastric Restrictive Procedure - Laparoscopic | 43772 | 0 - 10 |
| 1 | SURGERY      | GENERAL SURGERY | Gastric Restrictive Procedure - Laparoscopic | 43770 | 0 - 10 |
| 1 | SURGERY      | GENERAL SURGERY | Gastric Restrictive Procedure - Laparoscopic | 43775 | 0 - 10 |

|   |         |                   |                                      |       |        |
|---|---------|-------------------|--------------------------------------|-------|--------|
| 1 | SURGERY | GENERAL SURGERY   | Inguinal Hernia Repair               | 49525 | 0 - 10 |
| 1 | SURGERY | GENERAL SURGERY   | Inguinal Hernia Repair               | 49521 | 0 - 10 |
| 1 | SURGERY | GENERAL SURGERY   | Inguinal Hernia Repair               | 49520 | 0 - 10 |
| 1 | SURGERY | GENERAL SURGERY   | Inguinal Hernia Repair               | 49507 | 0 - 10 |
| 1 | SURGERY | GENERAL SURGERY   | Inguinal Hernia Repair               | 49505 | 0 - 10 |
| 1 | SURGERY | GENERAL SURGERY   | Inguinal Hernia Repair               | 49501 | 0 - 10 |
| 1 | SURGERY | GENERAL SURGERY   | Inguinal Hernia Repair - LAPAROSCOPY | 49651 | 0 - 5  |
| 1 | SURGERY | GENERAL SURGERY   | Inguinal Hernia Repair - LAPAROSCOPY | 49650 | 0 - 5  |
| 1 | SURGERY | GENERAL SURGERY   | Kidney Transplant Procedures         | 50340 | 0 - 10 |
| 1 | SURGERY | GENERAL SURGERY   | Kidney Transplant Procedures         | 50547 | 0 - 10 |
| 1 | SURGERY | GENERAL SURGERY   | Kidney Transplant Procedures         | 50370 | 0 - 10 |
| 1 | SURGERY | GENERAL SURGERY   | Kidney Transplant Procedures         | 50360 | 0 - 10 |
| 1 | SURGERY | GENERAL SURGERY   | Kidney Transplant Procedures         | 50320 | 0 - 10 |
| 1 | SURGERY | GENERAL SURGERY   | Removal - Kidney - Laparoscopic      | 50548 | 0 - 10 |
| 1 | SURGERY | GENERAL SURGERY   | Removal - Kidney - Laparoscopic      | 50546 | 0 - 10 |
| 1 | SURGERY | GENERAL SURGERY   | Removal - Kidney - Laparoscopic      | 50545 | 0 - 10 |
| 1 | SURGERY | GENERAL SURGERY   | Removal - Kidney - Laparoscopic      | 50543 | 0 - 10 |
| 1 | SURGERY | GENERAL SURGERY   | Thyroidectomy                        | 60271 | 0 - 5  |
| 1 | SURGERY | GENERAL SURGERY   | Thyroidectomy                        | 60270 | 0 - 5  |
| 1 | SURGERY | GENERAL SURGERY   | Thyroidectomy                        | 60260 | 0 - 5  |
| 1 | SURGERY | GENERAL SURGERY   | Thyroidectomy                        | 60254 | 0 - 5  |
| 1 | SURGERY | GENERAL SURGERY   | Thyroidectomy                        | 60252 | 0 - 5  |
| 1 | SURGERY | GENERAL SURGERY   | Thyroidectomy                        | 60240 | 0 - 5  |
| 1 | SURGERY | GENERAL SURGERY   | Thyroidectomy                        | 60225 | 0 - 5  |
| 1 | SURGERY | GENERAL SURGERY   | Thyroidectomy                        | 60220 | 0 - 5  |
| 1 | SURGERY | GENERAL SURGERY   | Thyroidectomy                        | 60212 | 0 - 5  |
| 1 | SURGERY | GENERAL SURGERY   | Thyroidectomy                        | 60210 | 0 - 5  |
| 1 | SURGERY | GENERAL SURGERY   | Umbilical Hernia Repair              | 49587 | 0 - 15 |
| 1 | SURGERY | GENERAL SURGERY   | Umbilical Hernia Repair              | 49585 | 0 - 15 |
| 1 | SURGERY | GENERAL SURGERY   | Umbilical Hernia Repair              | 49582 | 0 - 15 |
| 1 | SURGERY | GENERAL SURGERY   | Umbilical Hernia Repair              | 49580 | 0 - 15 |
| 1 | SURGERY | GENERAL SURGERY   | Ventral Hernia Repair                | 49568 | 0 - 15 |
| 1 | SURGERY | GENERAL SURGERY   | Ventral Hernia Repair                | 49566 | 0 - 15 |
| 1 | SURGERY | GENERAL SURGERY   | Ventral Hernia Repair                | 49565 | 0 - 15 |
| 1 | SURGERY | GENERAL SURGERY   | Ventral Hernia Repair                | 49561 | 0 - 15 |
| 1 | SURGERY | GENERAL SURGERY   | Ventral Hernia Repair                | 49560 | 0 - 15 |
| 1 | SURGERY | SURGICAL ONCOLOGY | Breast Reconstruction/Revision       | 19367 | 0 - 15 |
| 1 | SURGERY | SURGICAL ONCOLOGY | Breast Reconstruction/Revision       | 19361 | 0 - 15 |
| 1 | SURGERY | SURGICAL ONCOLOGY | Breast Reconstruction/Revision       | 19355 | 0 - 15 |
| 1 | SURGERY | SURGICAL ONCOLOGY | Breast Reconstruction/Revision       | 19370 | 0 - 15 |
| 1 | SURGERY | SURGICAL ONCOLOGY | Breast Reconstruction/Revision       | 19357 | 0 - 15 |
| 1 | SURGERY | SURGICAL ONCOLOGY | Breast Reconstruction/Revision       | 19350 | 0 - 15 |
| 1 | SURGERY | SURGICAL ONCOLOGY | Breast Reconstruction/Revision       | 19364 | 0 - 15 |
| 1 | SURGERY | SURGICAL ONCOLOGY | Breast Reconstruction/Revision       | 19380 | 0 - 15 |
| 1 | SURGERY | SURGICAL ONCOLOGY | Breast Reconstruction/Revision       | 19366 | 0 - 15 |
| 1 | SURGERY | SURGICAL ONCOLOGY | Breast Reconstruction/Revision       | 19369 | 0 - 15 |

|   |         |                   |                                |       |        |
|---|---------|-------------------|--------------------------------|-------|--------|
| 1 | SURGERY | SURGICAL ONCOLOGY | Breast Reconstruction/Revision | 19368 | 0 - 15 |
| 1 | SURGERY | SURGICAL ONCOLOGY | Breast Reconstruction/Revision | 19371 | 0 - 15 |
| 1 | SURGERY | SURGICAL ONCOLOGY | Mastectomy, simple             | 19304 | 0 - 10 |
| 1 | SURGERY | SURGICAL ONCOLOGY | Mastectomy, simple             | 19303 | 0 - 10 |
| 1 | SURGERY | THORACIC SURGERY  | Lung Removal                   | 32670 | 0 - 15 |
| 1 | SURGERY | THORACIC SURGERY  | Lung Removal                   | 32671 | 0 - 15 |
| 1 | SURGERY | THORACIC SURGERY  | Lung Removal                   | 32669 | 0 - 15 |
| 1 | SURGERY | THORACIC SURGERY  | Lung Removal                   | 32663 | 0 - 15 |
| 1 | SURGERY | THORACIC SURGERY  | Lung Removal                   | 32667 | 0 - 15 |
| 1 | SURGERY | THORACIC SURGERY  | Lung Removal                   | 32668 | 0 - 15 |
| 1 | SURGERY | THORACIC SURGERY  | Lung Removal                   | 32666 | 0 - 15 |
| 1 | SURGERY | UROLOGY           | Radical Prostatectomy          | 38571 | 0 - 5  |
| 1 | SURGERY | UROLOGY           | Radical Prostatectomy          | 55866 | 0 - 5  |
| 1 | SURGERY | UROLOGY           | Radical Prostatectomy          | 55845 | 0 - 5  |
| 1 | SURGERY | UROLOGY           | Radical Prostatectomy          | 55831 | 0 - 5  |
| 1 | SURGERY | UROLOGY           | Radical Prostatectomy          | 55821 | 0 - 5  |
| 1 | SURGERY | UROLOGY           | Vasectomy                      | 55250 | 0 - 5  |

eFigure1: Prediction Model Including Discharge Pain Score, Opioid Exposure, and Guideline Recommendations

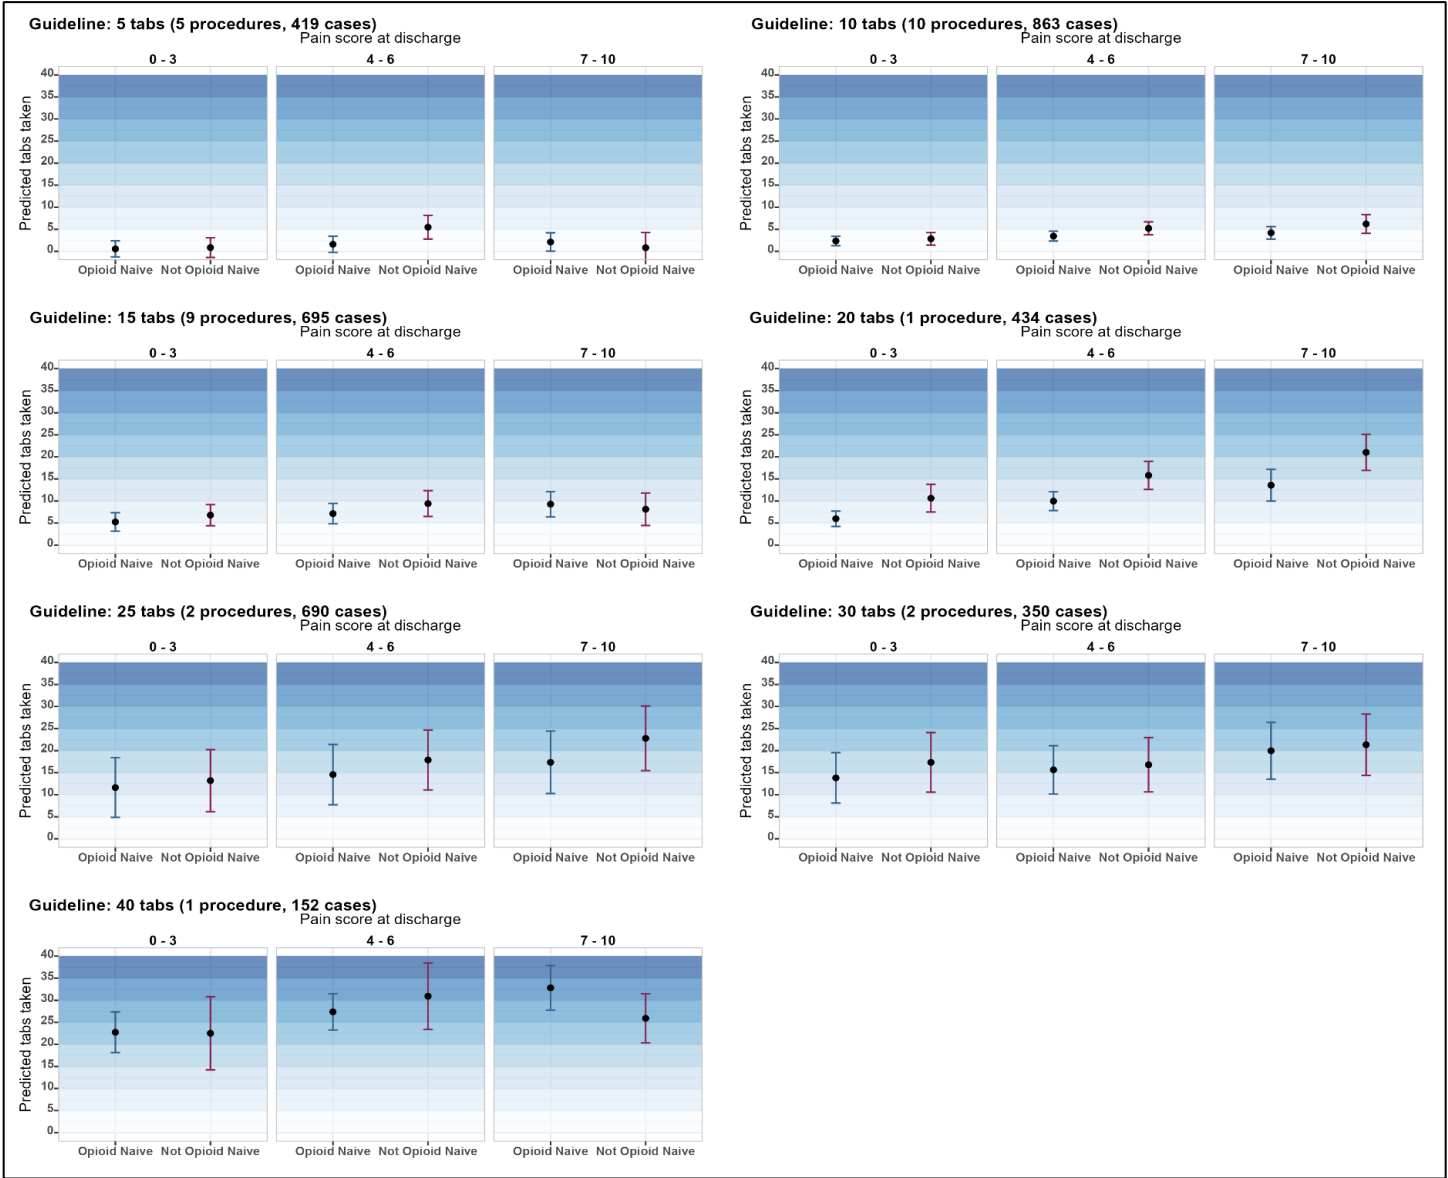

eFigure 2: Average Marginal Effect (AME) of Patient Reported Use Compared Against Prescribed Quantity

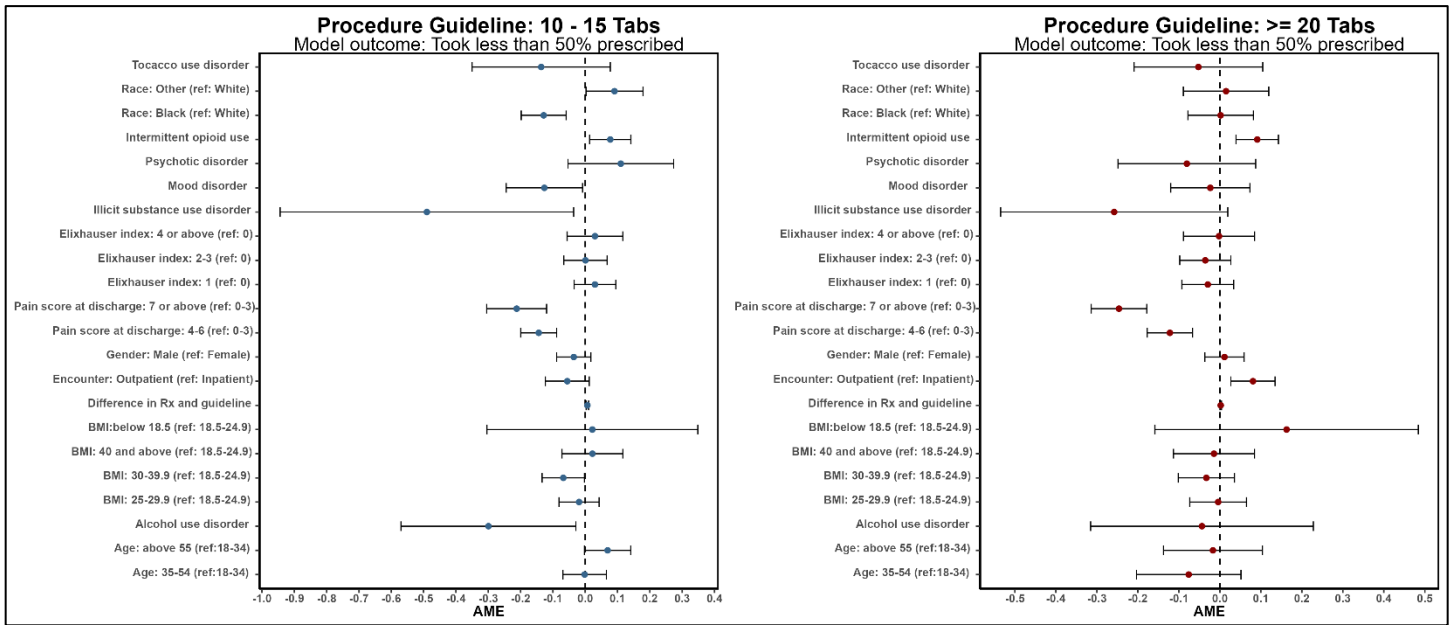

eFigure 3: Average Marginal Effect of Patient Reported Low or No Use

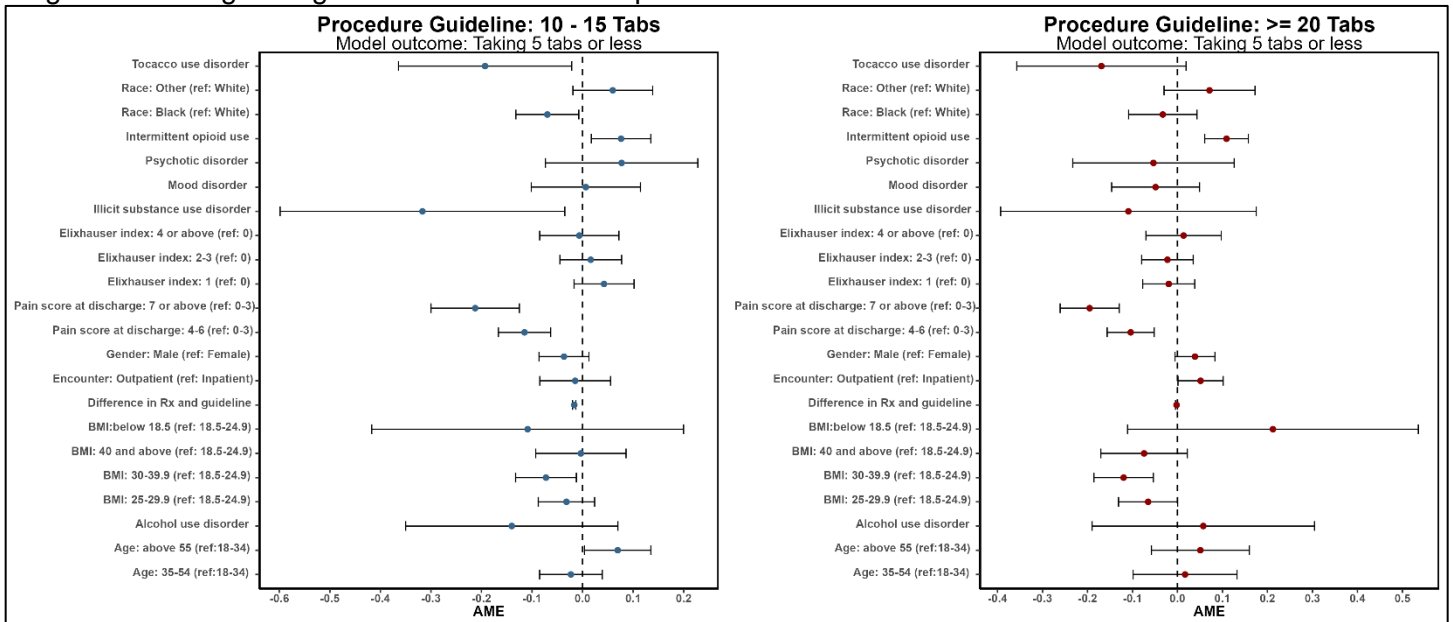

Supplement: as9-4-e355-s001.pdf [file as9-4-e355-s001.pdf]
